# Supplementary material
Source: PubMed Central journal article supplement (PMC2894626)

## SUPPLEMENTAL RESULTS

### *Effect of 50 or 500 $\mu\text{M}$ bumetanide.*

We have tried blocking NKCC with a low concentration (50  $\mu\text{M}$ ) of bumetanide to rule out the possibility that inactivation of NKCC during  $\text{Ca}^{2+}$  spiking contributes to the negative  $E_{\text{gly}}$  shift after  $\text{Ca}^{2+}$  spiking ( $n = 5$ ). The resting  $E_{\text{gly}}$  (in TTX, without dye) shifted by  $-3.4 \pm 1.7$  mV ( $p = 0.012$ , paired  $t$ -test) during the initial 15 min of bumetanide superfusion, and then remained relatively stable ( $\Delta E$  0–0.6 mV) over the next 15 min. The largest shift ( $-6.1$  mV) in resting  $E_{\text{gly}}$  was observed from a cell with a control resting  $E_{\text{gly}}$  of  $-69.8$  mV, the most positive among the 5 cells, and the smallest shift ( $-1.1$  mV) was from a cell with the most negative control  $E_{\text{gly}}$  ( $-76.7$  mV). The correlation coefficient ( $r$ ) between the control resting  $E_{\text{gly}}$  and the magnitude of negative shift in resting  $E_{\text{gly}}$  in bumetanide was  $-0.88$  ( $n = 5$ ,  $p = 0.049$ ). Among the four cells in which resting  $E_{\text{gly}}$  were measured  $> 10$  min after bumetanide wash-out, only the cell that had the largest negative shift in the drug showed a partial recovery (by 2.2 mV) in  $E_{\text{gly}}$ , and in others the  $E_{\text{gly}}$  shifted further negative by 0.5 to 1.3 mV.  $\text{Ca}^{2+}$  spiking still induced a negative shift in  $E_{\text{gly}}$  in bumetanide of similar magnitude to control conditions in all 5 cells. In 2 of 5 cells, the half-time of recovery from the negative  $E_{\text{gly}}$  shift appeared delayed by about 5 sec in bumetanide compared to under control conditions, but in other cells the time course was almost identical.

As a final check for our hypothesis, we examined  $E_{\text{gly}}$  under 500  $\mu\text{M}$  bumetanide. At this concentration, KCCs are expected to be blocked ( $\text{IC}_{50}$  or  $\text{K}_i$  for KCCs, 40 ~ 180  $\mu\text{M}$ ; Gamba, 2005) in addition to NKCCs, while anion exchangers may not be significantly affected ( $\text{IC}_{50}$  for AE, 820  $\mu\text{M}$ ; Culliford et al. 2003). During initial 12 min of 500  $\mu\text{M}$  bumetanide (in TTX) perfusion, the resting  $E_{\text{gly}}$  was monitored with cells held at  $-75$  mV in  $v$ -clamp, and afterwards the activity-dependent  $E_{\text{gly}}$  shift was examined. Glycine responses were slightly attenuated in 500  $\mu\text{M}$  bumetanide. The net change in resting  $E_{\text{gly}}$  after 12 min in bumetanide was either positive or negative ( $n = 5$  cells). The direction of such shifts appeared to depend on the level of control resting  $E_{\text{gly}}$ . Two cells with the control  $E_{\text{gly}}$  at  $\sim -74$  mV showed positive shifts ( $\sim 2$  mV) during the first 2–3 min and then the resting  $E_{\text{gly}}$  shifted negative resulting in  $< 2$  mV net negative shifts at the end of

12 min. Two other cells with the resting  $E_{\text{gly}}$  at  $-80$  and  $-85$  mV showed 5.8 and 3.5 mV positive shift, respectively, during the initial 3 min, while 10 min later the net shift in  $E_{\text{gly}}$  was +4.1 mV for both cells. For the remaining cell with the control  $E_{\text{gly}}$  at  $-67$  mV, the resting  $E_{\text{gly}}$  shifted only negative ( $-5.9$  mV) during perfusion of 500  $\mu\text{M}$  bumetanide. Except for this cell, the resting  $E_{\text{gly}}$  was monitored during wash-out of 500  $\mu\text{M}$  bumetanide: the  $E_{\text{gly}}$  shifted negative for all of them ( $-1.5$  to  $-9$  mV) during  $> 10$  min of wash-out. That the resting  $E_{\text{gly}}$  shifted positive, although transiently, during 500  $\mu\text{M}$  bumetanide wash-in and that it shifted negative at wash-out are supportive of inhibition of steady-state KCC activity by 500  $\mu\text{M}$  bumetanide. The activity-dependent negative shift in  $E_{\text{gly}}$  remained in 500  $\mu\text{M}$  bumetanide, and the time-course of recovery was not noticeably different from control condition, as observed with 50  $\mu\text{M}$  bumetanide. For comparison of the magnitude of peak negative shift between the control and 500  $\mu\text{M}$  bumetanide, current injection was increased (by 10–100 pA) in bumetanide to evoke similar number of  $\text{Ca}^{2+}$  spikes ( $\pm 9$  spikes) to control condition, as fewer  $\text{Ca}^{2+}$  spikes were evoked in 500  $\mu\text{M}$  bumetanide. The peak negative  $E_{\text{gly}}$  shift did not significantly change by 500  $\mu\text{M}$  bumetanide ( $n = 4$ , mean  $\Delta E = -0.1$  mV, paired  $t$ -test,  $p = 0.39$ ).

*$[\text{Ca}^{2+}]_i$  change associated with weak acid/base application.*

Changes in  $[\text{Ca}^{2+}]_i$  during intracellular acidification or alkalization induced with weak acid or base have been reported in various cell types, but the direction of change is inconsistent across different studies. For example, increase in  $[\text{Ca}^{2+}]_i$  was shown during both the intracellular alkalization and acidification induced by  $\text{NH}_4\text{Cl}$  or other weak base and weak acid by Batlle et al. (1993), Martinez-Zaguilan et al. (1996), OuYang et al. (1994) and Wu et al. (1999), but a decrease in  $[\text{Ca}^{2+}]_i$  during  $\text{NH}_4\text{Cl}$ -induced intracellular alkalization has also been demonstrated by Iino et al. (1994) and Kaila and Voipio (1990). We wondered therefore whether in CWCs, the propionate-induced acidification and the TMA-induced alkalization were associated with a rise and fall in  $[\text{Ca}^{2+}]_i$ , respectively. If true, then both the weak acid-mediated and the complex spiking-mediated negative shift in  $E_{\text{gly}}$  might be regarded as a consequence of  $\text{Ca}^{2+}$ 's modulation of  $\text{Cl}^-$  transporters. We did not monitor  $[\text{Ca}^{2+}]_i$  during the propionate or TMA challenge but have done simultaneous Fura-2 and SNARF imaging with  $\text{NH}_4\text{Cl}$  on 5 CWCs held at

-75 mV in v-clamp (in TTX). Five mM NH<sub>4</sub>Cl for CWCs caused a barely noticeable alkalinization at wash-in, which was soon followed by an acidification during the presence of NH<sub>4</sub>Cl (2 min). The peak intracellular acidification occurred within 1 min of NH<sub>4</sub>Cl wash out ( $-15.4 \pm 2.8$  in % $\Delta F/F$ ,  $n = 5$ ). In none of the 5 CWCs, was there a noticeable change in Fura-2 signal ( $Ca^{2+}_i$ ) during wash-in and out of NH<sub>4</sub>Cl, while an 8-sec complex spiking or  $Ca^{2+}$  spiking produced a clear signal ( $-27.6 \pm 4.6$  in % $\Delta F/F$ ) in the same cells. Therefore, considering that the NH<sub>4</sub>Cl-induced intracellular acidification is larger than that by propionate ( $-8.4 \pm 3.1$  in % $\Delta F/F$ ), it seemed unlikely that  $[Ca^{2+}]_i$  rose significantly during the propionate-induced acidification in CWCs.

*The change in the negative  $E_{gly}$  shift imposed by nominal removal of  $HCO_3^-/CO_2$ .*

The degree of negative  $E_{gly}$  shift on an intracellular acidification appeared lessened in HEPES/O<sub>2</sub> compared with that in the control, HCO<sub>3</sub><sup>-</sup>/CO<sub>2</sub>-buffered, condition. This was supported by the following findings: 1) in 5 cases (from 5 cells) of control-HEPES/O<sub>2</sub> pair of  $E_{gly}/pH_i$  series with 8-sec depolarization in which the number of evoked  $Ca^{2+}$  spikes was similar (0 to 4 more  $Ca^{2+}$  spikes in HEPES/O<sub>2</sub>), the peak acidification was larger (by  $165 \pm 22$  % in SNARF  $\Delta F/F$ ) in HEPES/O<sub>2</sub> than in control condition ( $p = 0.002$ , paired  $t$ -test) while the magnitude of negative  $E_{gly}$  shift was  $0.1 \pm 0.9$  mV less in HEPES/O<sub>2</sub> ( $p = 0.79$ , paired  $t$ -test)(Figure 8Ai). 2) in 8 cases (from 8 cells) of control-HEPES/O<sub>2</sub> pair in which the negative  $E_{gly}$  shift was similar in magnitude (0 to 0.4 mV larger in HEPES/O<sub>2</sub>), the peak acidification was larger (by  $176 \pm 22$  %) again in HEPES/O<sub>2</sub> than in controls ( $p < 0.001$ , paired  $t$ -test) with  $5.8 \pm 6.2$  more  $Ca^{2+}$  spikes evoked in HEPES/O<sub>2</sub> ( $p = 0.034$ , paired  $t$ -test). Also, the time of peak negative  $E_{gly}$  shift became delayed to the next measurement point (10 to 15 sec later) in 6 of 12 cells subjected to HEPES/O<sub>2</sub>, including 3 cells in which the peak time in control condition was at the first point (2 sec) after spiking (e.g. Fig 8Ai).

## **SUPPLEMENTAL DISCUSSION**

### **Estimated range of resting $[Cl^-]_i$ and potential causes of slow negative drift in $E_{gly}$**

The relation between  $[Cl^-]_i$  and  $E_{gly}$  according to the Goldman-Hodgkin-Katz (GHK) voltage equation,  $E_{gly} = (RT/F) \ln([Cl^-]_i + r [HCO_3^-]_i)/([Cl^-]_o + r [HCO_3^-]_o)$ , is

illustrated in Figure S3A-B for a range of  $[\text{HCO}_3^-]_i$ , 6–18 mM (corresponding to  $\text{pH}_i$  6.78–7.25), with the ratio ( $r$ ) of  $\text{HCO}_3^-$  permeability ( $P_{\text{HCO}_3}$ ) to that of  $\text{Cl}^-$  ( $P_{\text{Cl}}$ ) of 0.2 (A) or 0.1 (B) ( $P_{\text{HCO}_3}/P_{\text{Cl}}$  for glycine receptors has been measured to be 0.11 (Bormann et al., 1987) or 0.4 (Fatima-Shad and Barry, 1993). The  $\text{pH}_i$  indicated for each curve of different  $[\text{HCO}_3^-]_i$  in Figure S3 is derived from  $[\text{HCO}_3^-]_i/[\text{HCO}_3^-]_o = 10^{(\text{pH}_i - \text{pH}_o)}$  at fixed  $\text{pH}_o = 7.30$  and  $[\text{HCO}_3^-]_o = 20$  mM, based on the assumption that the partial pressure, solubility, and the dissociation constant of  $\text{CO}_2$  is equal intra- and extracellularly (Roos and Boron, 1981). Over an arbitrary resting  $\text{pH}_i$  of 6.95 – 7.15, the possible  $E_{\text{gly}}$  at  $[\text{Cl}^-]_i$  of 4 mM is  $-84.4 \sim -80.2$  mV ( $\Delta 4.2$  mV) and that at  $[\text{Cl}^-]_i$  of 12 mM  $-61.5 \sim -59.6$  mV ( $\Delta 1.9$  mV). Using the same range of resting  $\text{pH}_i$  and the two extreme values of the measured resting  $E_{\text{gly}}$ ,  $-58$  and  $-87$  mV, the range of resting  $[\text{Cl}^-]_i$  among CWCs was 2–14 mM.

The actual range of  $[\text{Cl}^-]_i$  among different CWCs may be wider than that estimated above because of the tendency for the resting  $E_{\text{gly}}$  to drift negative with time, and the reported resting  $E_{\text{gly}}$  values are those obtained some time after the drift had been noticed. The reason for the slow negative drift over time in resting  $E_{\text{gly}}$  is not clear. It is possible that, during the gramicidin perforated-patch recording, activation of KCCs and/or inactivation of NKCC (lowering  $[\text{Cl}^-]_i$ ) occurred or an intracellular acidification (lowering  $[\text{HCO}_3^-]_i$ ) developed. Slow intracellular acidification may occur unrelated to the perforated-patch recording due to possible build-up of metabolically generated acids in slice (cf. Trapp et al., 1996); however, this is unlikely in our case given that the negative drift in  $E_{\text{gly}}$  is generally faster during the early period of recording. The more negative resting  $E_{\text{gly}}$  in AM dye-loaded cells may be associated with lower resting  $\text{pH}_i$  levels due to increased intracellular acid generation from the de-esterification reaction, the byproducts of which are acetic acid and formaldehyde (which can be converted to formic acid) (Spray et al., 1984; Tsien and Pozzan, 1989). However, the acid build-up from AM ester hydrolysis is not expected to be too large because acetic acid and formaldehyde can diffuse out of the cell, and acetate may also be eliminated from the cell along with  $\text{H}^+$  by

monocarboxylate transporters (Pierre and Pellerin, 2005).

### **$E_{\text{gly}}$ shifts viewed with the Goldman-Hodgkin-Katz equation**

A typical change in  $E_{\text{gly}}$  and  $\text{pH}_i$  associated with complex/ $\text{Ca}^{2+}$  spiking and simple spiking is drawn in Figure S3D with labeled  $E_{\text{gly}}$  points. The change in  $[\text{Cl}^-]_i$  involved in the activity-dependent shifts in  $E_{\text{gly}}$  was estimated by identifying points along the curves of  $E_{\text{gly}}$  vs.  $[\text{Cl}^-]_i$  at different  $\text{pH}_i$  levels ( $P_{\text{HCO}_3}/P_{\text{Cl}} = 0.2$ ; Fig. S3A). The finding from such examination is described below with labels in parentheses referring to Figure S3D. 1) The decrease in  $[\text{Cl}^-]_i$  that can occur with a negative shift in  $E_{\text{gly}}$  associated with a  $\text{pH}_i$  decrease ( $P \rightarrow Q$  or  $P \rightarrow R$ ) is less than, i.e. limited by, what would occur without a  $\text{pH}_i$  change. This leads to the prediction of less than 1.6 mM and 0.7 mM decrease in  $[\text{Cl}^-]_i$  for a 3 mV negative shift accompanied with a  $\text{pH}_i$  decrease from  $E_{\text{gly}} -60$  mV and  $-80$  mV, respectively. The  $[\text{Cl}^-]_i$  decreases less the larger the intracellular acidification for a given magnitude of negative  $E_{\text{gly}}$  shift. 2) For a negative  $E_{\text{gly}}$  shift associated with a  $\text{pH}_i$  decrease ( $P \rightarrow Q$ ) and for a positive  $E_{\text{gly}}$  shift occurring with a  $\text{pH}_i$  increase ( $R \rightarrow S$ ), it is possible for the  $[\text{Cl}^-]_i$  to change in the opposite direction to that of  $\text{pH}_i$  if the  $\text{pH}_i$  change is large enough. For example, if  $\text{pH}_i = 7.15$  ( $[\text{HCO}_3^-]_i = 14$  mM) and  $E_{\text{gly}} = -72$  mV ( $[\text{Cl}^-]_i = 6.5$  mM) in the baseline condition and the  $E_{\text{gly}}$  shifts by  $-1$  mV (i.e.  $P \rightarrow Q$ ), then  $[\text{Cl}^-]_i$  must *rise* if the  $\text{pH}_i$  falls more than 0.06 unit ( $\Delta[\text{HCO}_3^-]_i = -1.7$  mM). If the  $E_{\text{gly}}$  shifts by  $-3$  mV (to  $-75$  mV), the  $[\text{Cl}^-]_i$  rises for acidification  $> 0.20$  pH unit ( $\Delta[\text{HCO}_3^-]_i = -5.0$  mM). 3) However if the  $E_{\text{gly}}$  goes negative with a  $\text{pH}_i$  rise ( $Q \rightarrow R$ ) or shifts positive with a  $\text{pH}_i$  drop ( $P \boxminus \rightarrow Q \boxminus$ ), the  $[\text{Cl}^-]_i$  will fall ( $Q \rightarrow R$ ) or rise ( $P \boxminus \rightarrow Q \boxminus$ ), and the change in  $[\text{Cl}^-]_i$  is greater than that without a  $\text{pH}_i$  change. For example, if the  $E_{\text{gly}}$  and  $\text{pH}_i$  at baseline is  $-72$  mV and 7.15, respectively, and each shifts by  $+1$  mV and  $-0.04$  after simple spiking ( $P \boxminus \rightarrow Q \boxminus$ ), the increase in  $[\text{Cl}^-]_i$  is 0.56 mM, which is 0.2 mM larger than what is expected without a  $\text{pH}_i$  change.

The predictions of the effect of  $\text{pH}_i$  decrease (i.e. lowered  $[\text{HCO}_3^-]_i$ ) on the  $E_{\text{gly}}$  shifts were based on a  $P_{\text{HCO}_3}/P_{\text{Cl}}$  of 0.2 for the glycine receptor. The influence of  $[\text{HCO}_3^-]_i$  on

the magnitude of  $E_{\text{gly}}$  shifts becomes less if the  $P_{\text{HCO}_3^-}/P_{\text{Cl}^-}$  is smaller (Fig. S3B) or if the concentration of intracellular and extracellular  $\text{HCO}_3^-$  is low at the same  $P_{\text{HCO}_3^-}/P_{\text{Cl}^-}$  (Fig. S3C). It should be added that the  $P_{\text{CO}_2}$  and  $\text{pH}_o$  may not be constant during the spiking activity associated with  $E_{\text{gly}}$  shifts (Chesler 2003; Voipio and Kaila, 1993), which would compromise our estimations of  $[\text{Cl}^-]_i$  change based on constant values of  $P_{\text{CO}_2}$ ,  $\text{pH}_o$ , and  $[\text{HCO}_3^-]_o$ .

We do not know the absolute values of resting  $\text{pH}_i$  or the magnitude of  $\text{pH}_i$  decrease induced by complex/ $\text{Ca}^{2+}$  spiking in CWCs. However, 20 mM propionate caused a similar range of peak changes in SNARF signal ( $-5 \sim -12\% \Delta F/F$ ) to that observed with complex/ $\text{Ca}^{2+}$  spiking in CWCs; moreover, intracellular acidifications of 0.04–0.15 pH unit were observed with 20 mM propionate in other cell types in  $\text{HCO}_3^-$ -buffered condition (Saarikoski et al., 1997; Xiong et al., 2000; Jacobs et al., 2008). Thus, assuming CWCs buffer pH at a level similar to that of other cells, the peak decrease in  $\text{pH}_i$  with complex/ $\text{Ca}^{2+}$  spiking may have been less than 0.2 pH units in  $\text{HCO}_3^-$ -buffered condition. Therefore, at least for cases where the peak negative  $E_{\text{gly}}$  shifts of  $> 3$  mV occurred after some recovery from peak acidification (e.g. Fig 5Bi control, 280 pA trace), the  $[\text{Cl}^-]_i$  must have fallen below baseline level, probably by 1~2 mM. Given that the predicted decrease in  $[\text{Cl}^-]_i$  was generally less than 2 mM with up to 4 mV negative shift in  $E_{\text{gly}}$ , it is understandable that the increase in MQAE fluorescence (reflecting a decrease in  $[\text{Cl}^-]_i$ ) was weak and became noticeable after rather excessive induction of complex spiking in each cell tested (Fig 6Bii); a  $\sim 1$  mM change in  $[\text{Cl}^-]_i$  seems unlikely to yield a detectable change in MQAE signal based on the intracellular calibration curve of Marandi et al. (2000).

### **Factors contributing to resting $E_{\text{gly}}$ in CWCs**

Given the discussion above, it is clear that in individual cells, the levels of  $[\text{Cl}^-]_i$  and  $[\text{HCO}_3^-]_i$  together determine the  $E_{\text{gly}}$ . The  $[\text{HCO}_3^-]_i$  will vary depending on the resting  $\text{pH}_i$ , the reported value of which ranges 6.90–7.30 in mean and 0.05–0.30 pH units in standard deviation in various rodent neurons (Pocock and Richards, 1992; Ou-yang et al., 1993; Schwiening and Boron, 1994; Leniger et al., 2004). On the

other hand,  $[Cl^-]_i$  must be determined by the differing prevalence in expression or activity of inward [e.g. NKCC1 (Plotkin et al., 1997), AE3 (Kopito et al., 1989; Hentschke et al., 2006)] and outward [e.g. KCC2 (Payne et al., 1996; Kanaka et al., 2001), NDCBE (Grichtchenko et al., 2001; Chen et al., 2008)]  $Cl^-$  transporters, which might vary in different CWCs. The expression of AE3 or NKCC1 in CWCs is not known at present, but KCC2 protein has been detected in rat DCN (Vale et al., 2005). The mechanism determining the resting  $E_{gly}$  in CWCs was not the focus of the present study, but some hints were gathered from the change in resting  $E_{gly}$  observed with certain experimental conditions. NKCC1 is likely to provide a steady inward transport of  $Cl^-$  in CWCs as 50  $\mu M$  bumetanide (Supplemental Results) shifted the resting  $E_{gly}$  negative. Additionally, AE-mediate  $Cl^-$  influx may contribute to steady-state  $[Cl^-]_i$  considering that H<sub>2</sub>DIDS or AZA addition (both in HCO<sub>3</sub><sup>-</sup>/CO<sub>2</sub>-buffered and HCO<sub>3</sub><sup>-</sup>/CO<sub>2</sub>-free Ringer) shifted the resting  $E_{gly}$  negative. However, this alternatively could arise from the lowered  $[HCO_3^-]_i$  associated with a possible decrease in resting  $pH_i$  secondary to block of constitutively active Na<sup>+</sup>-HCO<sub>3</sub><sup>-</sup> co-transport. In some cells, the H<sub>2</sub>DIDS or AZA/HEPES/O<sub>2</sub>-induced negative shift in resting  $E_{gly}$  involved conversion to a hyperpolarizing glycine response (e.g. Fig 7A). This suggests that the resting  $Cl^-$  extrusion mechanism partially survived in H<sub>2</sub>DIDS, and thus is most likely due to KCC. The initial positive shift and the variability of the net shift in the resting  $E_{gly}$  observed in 500  $\mu M$  bumetanide (Supplemental Results) suggests that the balance between the activities of NKCC and KCC sets the level of resting  $E_{gly}$  in CWCs.

The net transport direction of the electroneutral  $Cl^-$ -HCO<sub>3</sub><sup>-</sup> exchange by AE is determined by the transmembrane concentration gradient of  $Cl^-$  and HCO<sub>3</sub><sup>-</sup> (equilibrium when  $[Cl^-]_i/[Cl^-]_o = [HCO_3^-]_i/[HCO_3^-]_o$ ), and thus it can be made to work in the reverse mode ( $Cl^-$  efflux and HCO<sub>3</sub><sup>-</sup> influx) if bath  $Cl^-$  is lowered or the intracellular  $pH_i$  is decreased enough (Vaughan-Jones, 1986). In our experimental setting of  $[Cl^-]_o = 136.8$  mM,  $[HCO_3^-]_o = 20$  mM and  $pH_o = 7.30$ , the reversal  $pH_i$  for AE's transport direction seems to be very low (e.g. 6.24 if  $[Cl^-]_i = 12$  mM, 5.94 if  $[Cl^-]_i = 6$  mM), thus AE is expected to transport  $Cl^-$  inward under most conditions.

However, while AE's participation in maintenance of high  $[Cl^-]_i$  has been suggested in some smooth muscle cells (Chipperfield and Harper, 2000) and in cardiac Purkinje fibers (Vaughan-Jones, 1986), whether AE can provide significant  $Cl^-$  influx at the resting  $pH_i$  (6.90–7.30) in neurons is not yet known. The  $Cl^-HCO_3^-$  exchange activity in several non-neuronal cell types as well as in AE2- or AE3-transfected cell lines has been shown to be rather low at baseline  $pH_i$  increasing steeply at alkaline  $pH_i$  ( $> \sim 7.2$ ) (Olsnes et al., 1986; Boyarsky et al., 1988; Lee et al., 1991; Jiang et al., 1994; Leem et al., 1999). Considering that the  $Cl^-$  influx by AE is accompanied by gain of acid equivalents, mechanisms removing acid, such as  $Na^+H^+$  exchangers (NHEs) or  $Na^+HCO_3^-$  co-transporters (NBCs), may need to work in concert with AE for it to contribute to intracellular  $Cl^-$  level without disturbing the resting  $pH_i$  (Vaughan-Jones, 1986).

#### References

- Battle DC, Peces R, LaPointe MS, Ye M, Daugirdas JT (1993) Cytosolic free calcium regulation in response to acute changes in intracellular pH in vascular smooth muscle. *Am J Physiol Cell Physiol* 264:C932-943.
- Boyarsky G, Ganz MB, Sterzel RB, Boron WF (1988) pH regulation in single glomerular mesangial cells. II.  $Na^+$ -dependent and -independent  $Cl^-HCO_3^-$  exchangers. *Am J Physiol* 255:C857-869.
- Chen LM, Kelly ML, Parker MD, Bouyer P, Gill HS, Felie JM, Davis BA, Boron WF (2008) Expression and localization of  $Na^+$ -driven  $Cl^-HCO_3^-$  exchanger (SLC4A8) in rodent CNS. *Neuroscience* 153:162-174.
- Chesler M, Rice ME (1991) Extracellular alkaline-acid pH shifts evoked by iontophoresis of glutamate and aspartate in turtle cerebellum. *Neuroscience* 41:257-267.
- Chipperfield AR, Harper AA (2000) Chloride in smooth muscle. *Prog Biophys Mol Biol* 74:175-221.
- Culliford SJ, Ellory JC, Lang H-J, Englert H, Staines HM, Wilkins RJ (2003) Specificity of Classical and Putative  $Cl^-$  Transport Inhibitors on Membrane Transport Pathways in Human Erythrocytes. *Cellular Physiology and Biochemistry* 13:181-188.
- Farrant M, Kaila K (2007) The cellular, molecular and ionic basis of GABA(A) receptor signalling. *Prog Brain Res* 160:59-87.
- Gamba G (2005) Molecular physiology and pathophysiology of electroneutral cation-chloride cotransporters. *Physiol Rev* 85:423-493
- Grichtchenko II, Choi I, Zhong X, Bray-Ward P, Russell JM, Boron WF (2001) Cloning, Characterization, and Chromosomal Mapping of a Human Electroneutral  $Na^+$ -driven  $Cl^-HCO_3^-$  Exchanger. *J Biol Chem* 276:8358-8363.
- Hentschke M, Wiemann M, Hentschke S, Kurth I, Hermans-Borgmeyer I, Seidenbecher T, Jentsch TJ, Gal A, Hubner CA (2006) Mice with a targeted disruption of the  $Cl^-/HCO_3^-$ -exchanger AE3 display a reduced seizure threshold. *Mol Cell Biol* 26:182-191.
- Iino S, Hayashi H, Saito H, Tokuno H, Tomita T (1994) Effects of intracellular pH on calcium currents and intracellular calcium ions in the smooth muscle of rabbit portal vein. *Exp Physiol* 79:669-680.



- Jacobs S, Ruusuvuori E, Sipila ST, Haapanen A, Damkier HH, Kurth I, Hentschke M, Schweizer M, Rudhard Y, Laatikainen LM, Tyynela J, Praetorius J, Voipio J, Hubner CA (2008) Mice with targeted *Slc4a10* gene disruption have small brain ventricles and show reduced neuronal excitability. *Proc Natl Acad Sci U S A* 105:311-316.
- Jiang L, Stuart-Tilley A, Parkash J, Alper SL (1994) pHi and serum regulate AE2-mediated Cl<sup>-</sup>/HCO<sub>3</sub><sup>-</sup> exchange in CHOP cells of defined transient transfection status. *Am J Physiol* 267:C845-856.
- Kaila K, Voipio J (1990) Dependence of intracellular free calcium and tension on membrane potential and intracellular pH in single crayfish muscle fibres. *Pflugers Archiv European Journal of Physiology* 416:501-511.
- Kanaka C, Ohno K, Okabe A, Kuriyama K, Itoh T, Fukuda A, Sato K (2001) The differential expression patterns of messenger RNAs encoding K-Cl cotransporters (KCC1,2) and Na-K-2Cl cotransporter (NKCC1) in the rat nervous system. *Neuroscience* 104:933-946.
- Kopito RR, Lee BS, Simmons DM, Lindsey AE, Morgans CW, Schneider K (1989) Regulation of intracellular pH by a neuronal homolog of the erythrocyte anion exchanger. *Cell* 59:927-937.
- Lee BS, Gunn RB, Kopito RR (1991) Functional differences among nonerythroid anion exchangers expressed in a transfected human cell line. *J Biol Chem* 266:11448-11454.
- Leem CH, Lagadic-Gossmann D, Vaughan-Jones RD (1999) Characterization of intracellular pH regulation in the guinea-pig ventricular myocyte. *J Physiol* 517 ( Pt 1):159-180.
- Leniger T, Thone J, Bonnet U, Hufnagel A, Bingmann D, Wiemann M (2004) Levetiracetam inhibits Na<sup>+</sup>-dependent Cl<sup>-</sup>/HCO<sub>3</sub><sup>-</sup> exchange of adult hippocampal CA3 neurons from guinea-pigs. *Br J Pharmacol* 142:1073-1080.
- Marandi N, Konnerth A, Garaschuk O (2002) Two-photon chloride imaging in neurons of brain slices. *Pflugers Arch* 445:357-365.
- Martinez-Zaguilan R, Gurule MW, Lynch RM (1996) Simultaneous measurement of intracellular pH and Ca<sup>2+</sup> in insulin-secreting cells by spectral imaging microscopy. *Am J Physiol* 270:C1438-1446.
- Olsnes S, Tonnessen TI, Sandvig K (1986) pH-regulated anion antiport in nucleated mammalian cells. *J Cell Biol* 102:967-971.
- OuYang YB, Mellergard P, Kristian T, Kristianova V, Siesjo BK (1994) Influence of acid-base changes on the intracellular calcium concentration of neurons in primary culture. *Exp Brain Res* 101:265-271.
- Ou-yang Y, Mellergard P, Siesjo BK (1993) Regulation of intracellular pH in single rat cortical neurons in vitro: a microspectrofluorometric study. *J Cereb Blood Flow Metab* 13:827-840.
- Payne JA, Stevenson TJ, Donaldson LF (1996) Molecular characterization of a putative K-Cl cotransporter in rat brain. A neuronal-specific isoform. *J Biol Chem* 271:16245-16252.
- Pierre K, Pellerin L (2005) Monocarboxylate transporters in the central nervous system: distribution, regulation and function. *J Neurochem* 94:1-14.
- Plotkin MD, Kaplan MR, Peterson LN, Gullans SR, Hebert SC, Delpire E (1997) Expression of the Na<sup>(+)</sup>-K<sup>(+)</sup>-2Cl<sup>-</sup> cotransporter BSC2 in the nervous system. *Am J Physiol* 272:C173-183.
- Pocock G, Richards CD (1992) Hydrogen Ion Regulation in Rat Cerebellar Granule Cells Studied by Single-Cell Fluorescence Microscopy. *Eur J Neurosci* 4:136-143.
- Romero MF, Fulton CM, Boron WF (2004) The SLC4 family of HCO<sub>3</sub><sup>-</sup> transporters. *Pflugers Arch* 447:495-509.
- Saarikoski J, Ruusuvuori E, Koskelainen A, Donner K (1997) Regulation of intracellular pH in salamander retinal rods. *J Physiol* 498:61-72.
- Schwiening CJ, Boron WF (1994) Regulation of intracellular pH in pyramidal neurones from the rat hippocampus by Na<sup>(+)</sup>-dependent Cl<sup>(-)</sup>-HCO<sub>3</sub><sup>-</sup> exchange. *J Physiol* 475:59-67.

- Spray D, Nerbonne J, Campos de Carvalho A, Harris A, Bennett M (1984) Substituted benzyl acetates: a new class of compounds that reduce gap junctional conductance by cytoplasmic acidification. *J Cell Biol* 99:174-179.
- Trapp S, Luckermann M, Brooks PA, Ballanyi K (1996) Acidosis of rat dorsal vagal neurons in situ during spontaneous and evoked activity. *J Physiol* 496:695-710.
- Tsien R, Pozzan T (1989) Measurement of cytosolic free  $\text{Ca}^{2+}$  with quin2. *Methods Enzymol* 172:230-262.
- Vale C, Caminos E, Martinez-Galan JR, Juiz JM (2005) Expression and developmental regulation of the  $\text{K}^{+}$ - $\text{Cl}^{-}$  cotransporter KCC2 in the cochlear nucleus. *Hear Res* 206:107-115.
- Vaughan-Jones RD (1986) An investigation of chloride-bicarbonate exchange in the sheep cardiac Purkinje fibre. *J Physiol* 379:377-406.
- Voipio J, Kaila K (1993) Interstitial  $\text{PCO}_2$  and pH in rat hippocampal slices measured by means of a novel fast  $\text{CO}_2/\text{H}^{+}$ -sensitive microelectrode based on a PVC-gelled membrane. *Pflugers Arch* 423:193-201.
- Wu M-L, Chen J-H, Chen W-H, Chen Y-J, Chu K-C (1999) Novel role of the  $\text{Ca}^{2+}$ -ATPase in NMDA-induced intracellular acidification. *Am J Physiol Cell Physiol* 277:C717-727.
- Xiong Z-Q, Saggau P, Stringer JL (2000) Activity-Dependent Intracellular Acidification Correlates with the Duration of Seizure Activity. *J Neurosci* 20:1290-1296.

## SUPPLEMENTAL FIGURE LEGENDS

### Figure S1. Measurement of $E_{\text{gly}}$ with a voltage ramp protocol

(A-C) An example from one cell illustrating how a series of  $E_{\text{gly}}$  measurements was made to generate the time plot of  $E_{\text{gly}}$  with respect to  $\text{Ca}^{2+}$  spiking. Bath solution contained TTX 0.4  $\mu\text{M}$ , APV 100  $\mu\text{M}$ , and DNQX 10  $\mu\text{M}$ . (A) The recording began at  $t = 0$  (sec) in i-clamp with a bias current for setting the  $V_m$  close to  $-75$  mV. In this cell, the  $V_m$  was held below  $-75$  mV with  $-30$  pA bias to reduce the post- $\text{Ca}^{2+}$  spiking depolarization. At  $t = 5$  and every 15 sec (except just after  $\text{Ca}^{2+}$  spiking) the recording mode was switched to v-clamp for 4 sec to measure  $E_{\text{gly}}$  with the voltage ramp protocol (B).  $\text{Ca}^{2+}$  spiking was induced for 8 sec at  $t = 35$  in i-clamp. The short  $V_m$  traces from different time points show responses to 2 mM-8 msec glycine puffs. (Bi left) The unit voltage ramp command protocol was run 4 times consecutively to obtain 2 glycine responses (1st and 3rd run) and 2 control responses. (Bi, right) Ramp responses obtained 5 sec before  $\text{Ca}^{2+}$  spiking, 8 sec after  $\text{Ca}^{2+}$  spiking, and at the end of the series. A trace without glycine (gray) and one with glycine (red) are superimposed. The uncorrected  $E_{\text{gly}}$  was taken from the voltage on the ramp where the two responses crossed. (Bii) I-V plot of glycine currents at different times with respect to  $\text{Ca}^{2+}$  spiking was generated by subtracting the control ramp response from that with glycine in each set of ramp responses. (C) Time plot of  $R_s$ -corrected  $E_{\text{gly}}$ . Gray rectangle shows the period of  $\text{Ca}^{2+}$  spiking. The clamp current at  $V_H = -75$  mV,  $I_{\text{hold}}$ , is also plotted below each  $E_{\text{gly}}$  points. Inward shift in  $I_{\text{hold}}$  after  $\text{Ca}^{2+}$  spiking reflects depolarized  $V_m$ , as shown in  $t=58$  trace in (A).

(D) Slow negative drift in the resting  $E_{\text{gly}}$  in CWCs.  $E_{\text{gly}}$  was measured in TTX, DNQX and APV with the voltage ramp protocol. (Di) Each series of symbols represents measurements from one cell, and 24 cells are shown. Symbols are connected with a dotted line if one or more  $\text{Ca}^{2+}$  spike experiment as in (A-C) was run in between. The first point in each series is the first  $E_{\text{gly}}$  with  $R_s < 60 \text{ M}\Omega$ . The last point in a series is the last measurement either before recording termination or before a drug was added. (Dii)

Plot of difference in the resting  $E_{\text{gly}}$  between the last measurement and the first measurement versus the time elapsed between the two measurements. Dots represent single CWCs, and are from 94 cells including the cells shown in (Di).

**Figure S2.** Activity-induced intracellular acidifications detected with fluorescent imaging (A) The SNARF fluorescence images and intensity signals at acquisition. Excitation at 547 nm, emission filtered at  $> 600$  nm. A CWC was loaded with SNARF-5F by diffusion of the AM form of dye from the recording pipette. In each image shown in the top row, the ROIs are placed inside the cell body, over the recording pipette on the right of cell body, and in the background. The fluorescence in the recording pipette is from the intracellular compartment evaginated into the pipette tip. (Ai, bottom) The average fluorescent intensity of the 3 ROIs (top) as appeared in the image acquisition software during an 8-s challenge protocol. A 150-pA current injection evoked complex spikes during the period indicated with thick bar. (Aii bottom) An example showing the detection of patch rupture from an abrupt fall in the fluorescence of the ROI drawn over the recording pipette.

(B) pH imaging performed with a different indicator, pHrodo (A gift from Daniel Beecham, Molecular Probes/Invitrogen). This rhodamine-based dye (excited at 555 nm, emission filtered at  $> 600$  nm) increases fluorescence as pH decreases. In both (Bi) and (Bii) the image and the bottom pH trace are from one cell, and the top trace is from a different cell. (Bi) pHrodo loaded into a CWC through perforated patch with 50  $\mu\text{M}$  of the AM form in a recording solution composed of (in mM) 147 K-gluconate, 4 NaCl, 4 NaOH, 10 HEPES. The nearby area was stained by the dye leaking from the recording pipette when the cell was patched. The acidification on complex spiking induced with an 8-sec current injection occurred in the same pattern as that seen with SNARF. (Bii) pH imaging in whole-cell configuration was done using the free acid form of pHrodo (100  $\mu\text{M}$ ) in a K-gluconate-based recording solution containing 9 mM HEPES and nucleotides (pH 7.30). 8-sec current injections evoking complex spikes induced an acidification, but unlike with perforated patch recording, the acidification decayed faster and was followed by apparent rebound alkalization and acidification.

**Figure S3.** Plots of  $E_{\text{gly}}$  vs.  $[\text{Cl}^-]_i$  according to the Goldman-Hodgkin-Katz equation.

(A-B) Each curve represents the relation between  $[\text{Cl}^-]_i$  and  $E_{\text{gly}}$  according to the Goldman-Hodgkin-Katz voltage equation with the  $P_{\text{HCO}_3^-}/P_{\text{Cl}^-}$  at 0.2 (A) or 0.1 (B) for the glycine receptor at a given  $[\text{HCO}_3^-]_i$  ranging 6–18 mM. The  $\text{pH}_i$  indicated is derived from  $[\text{HCO}_3^-]_i/[\text{HCO}_3^-]_o = 10^{(\text{pH}_i - \text{pH}_o)}$  at fixed  $\text{pH}_o = 7.30$  and  $[\text{HCO}_3^-]_o = 20$  mM, based on the assumption that the partial pressure, solubility, and the dissociation constant of  $\text{CO}_2$  is equal intra- and extracellularly. The plot of  $E_{\text{Cl}}$  is also drawn according to the Nernst equation. The temperature used in equations is 34  $^\circ\text{C}$ .

(C) The curves were generated as in (A) but with 3 mM  $[\text{HCO}_3^-]_o$  in equilibrium with 7.2 mmHg  $\text{CO}_2$  at  $\text{pH}_o 7.20$ , a potential condition of slices in nominally  $\text{HCO}_3^-/\text{CO}_2$ -free Ringer. The value of  $P_{\text{CO}_2}$  was derive from the assumed 1% endogenous  $\text{CO}_2$  taken from Lamsa and Kaila (1997), and the  $\text{pH}_o$  was set lower than that of the  $\text{HCO}_3^-/\text{CO}_2$ -free Ringer, 7.30, as observed in other preparations (e.g. Chesler and

Rice, 1991; Voipio and Ballanyi, 1997).

(D) Schematic of typical time-dependent change in average  $V_m$ ,  $E_{gly}$ ,  $pH_i$  associated with an 8-sec complex/ $Ca^{2+}$  spiking (Di) and simple spiking (Dii).

#### References

Chesler M, Rice ME (1991) Extracellular alkaline-acid pH shifts evoked by iontophoresis of glutamate and aspartate in turtle cerebellum. *Neuroscience* 41:257-267.

Lamsa K, Kaila K (1997) Ionic Mechanisms of Spontaneous GABAergic Events in Rat Hippocampal Slices Exposed to 4-Aminopyridine. *J Neurophysiol* 78:2582-2591.

Voipio J, Ballanyi K (1997) Interstitial  $PCO_2$  and  $pH_i$ , and their role as chemostimulants in the isolated respiratory network of neonatal rats. *J Physiol* 499:527-542.

Figure S1

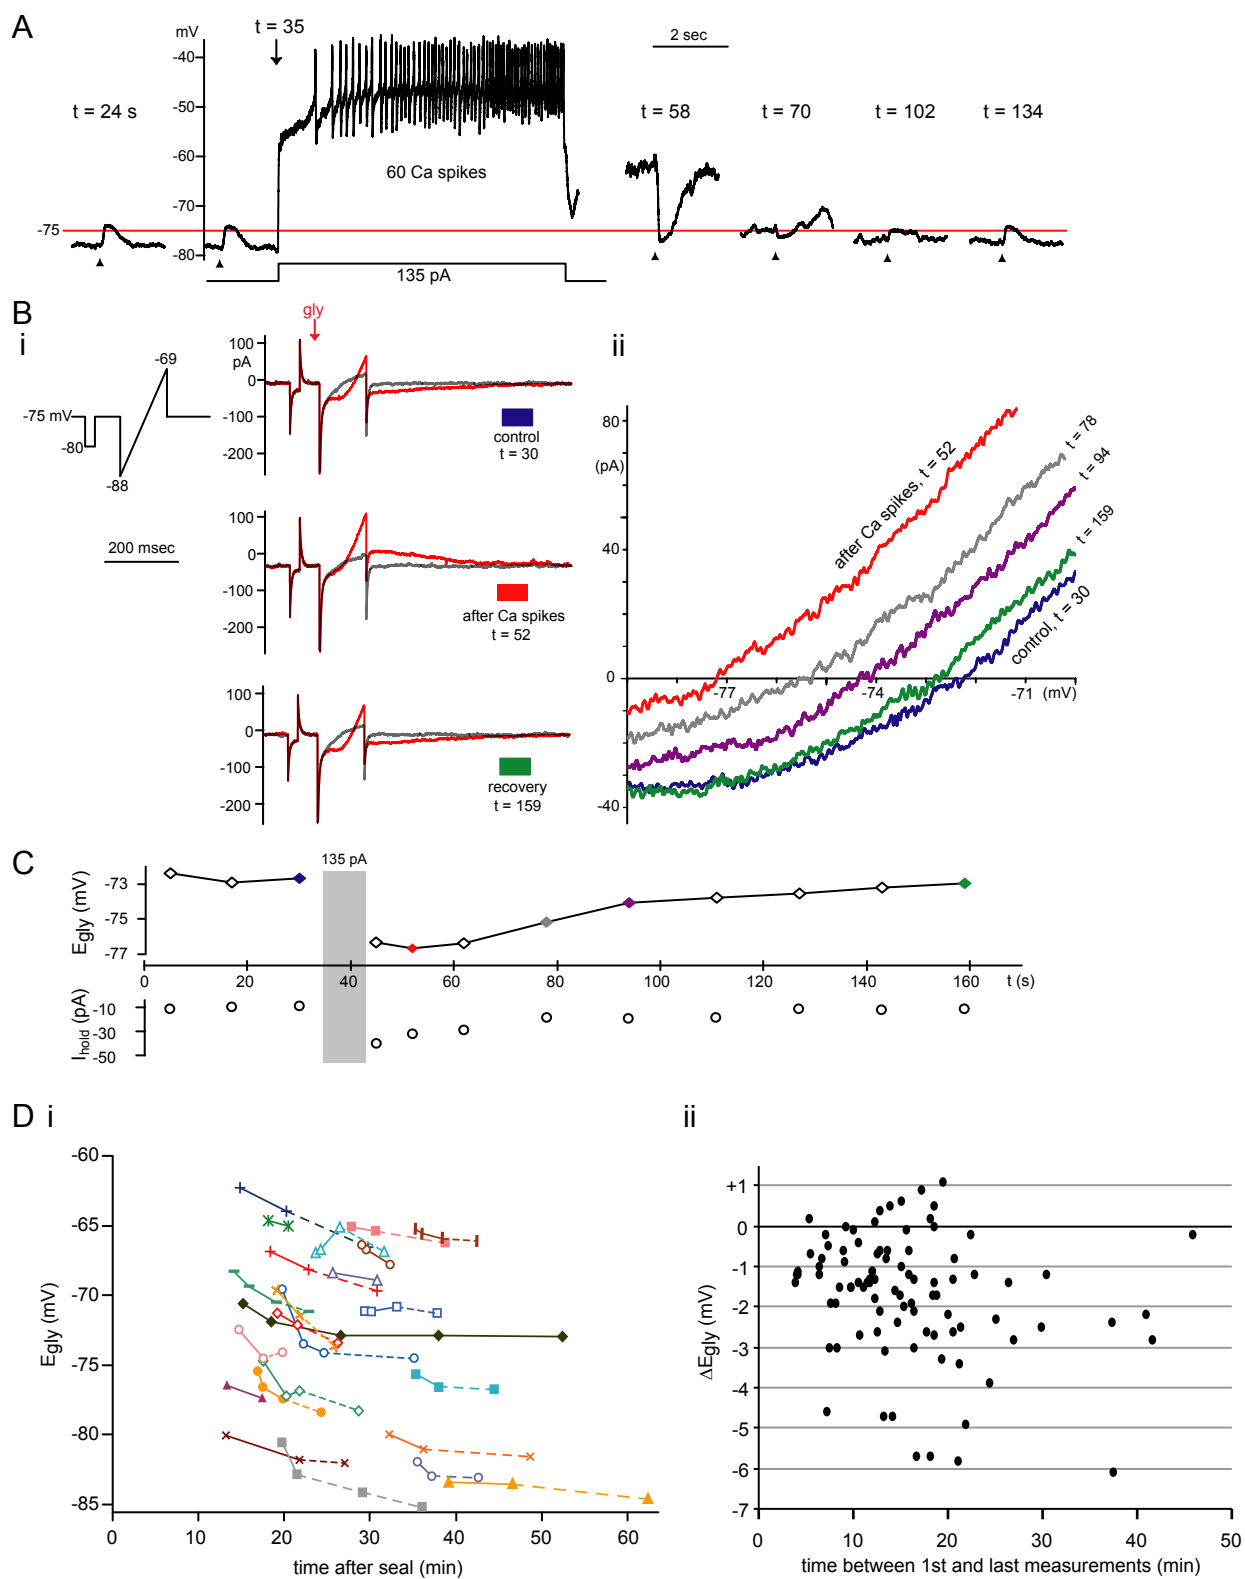

Figure S2

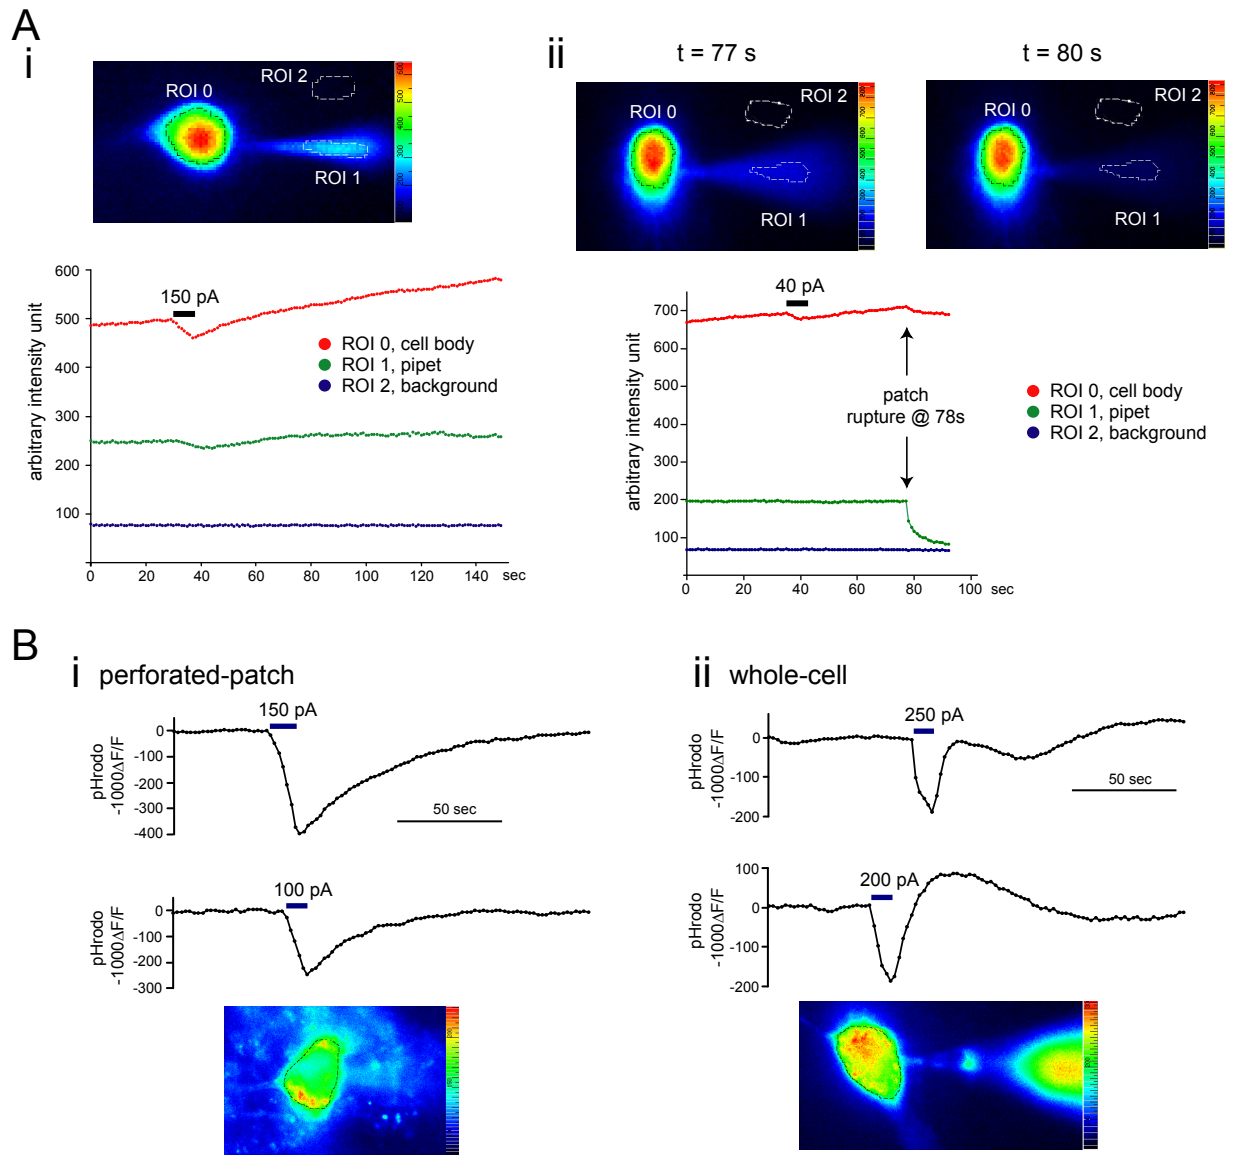

Figure S3

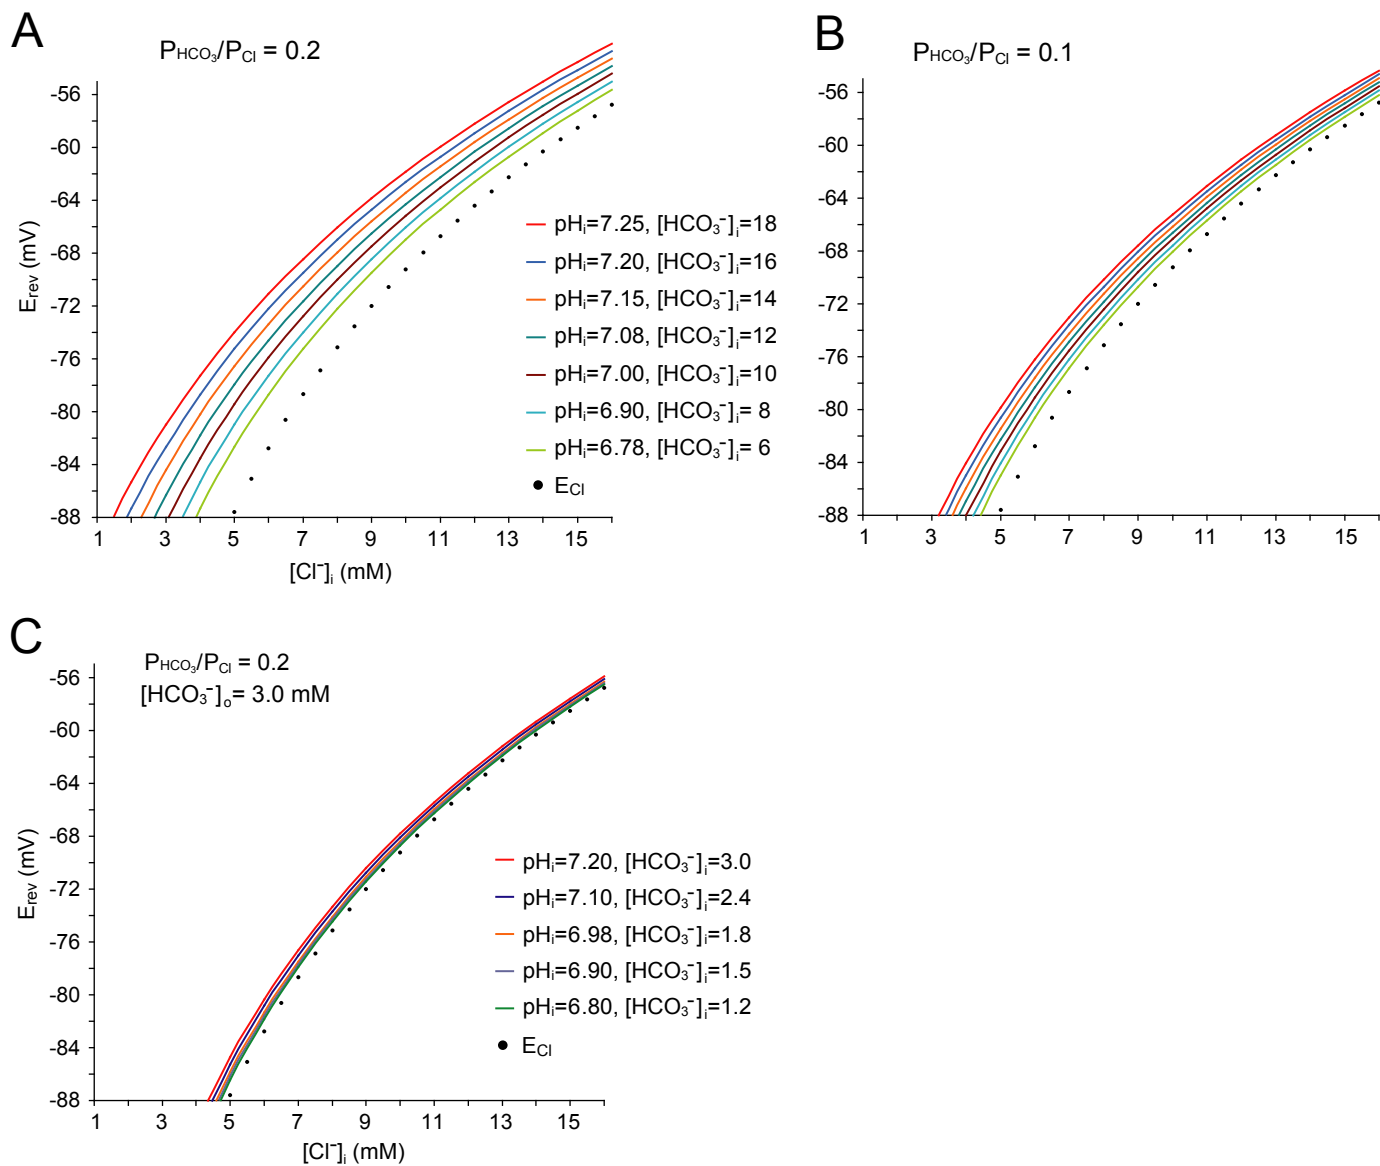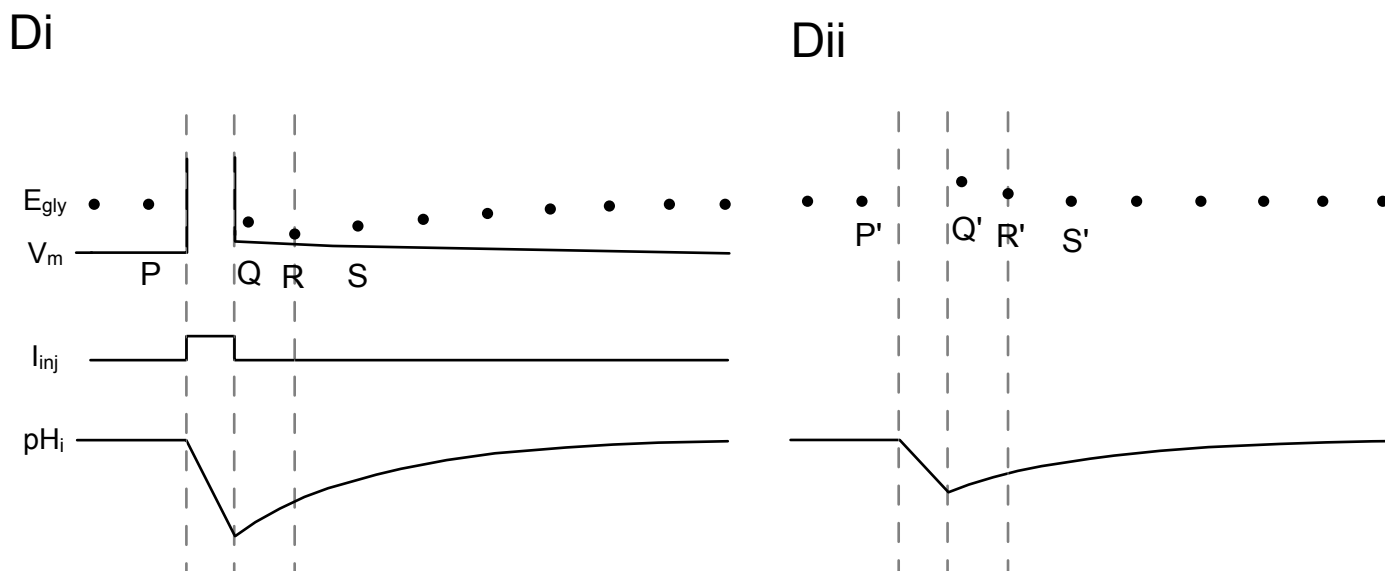

Supplement: NIHMS155955-supplement-Supp1.pdf [file NIHMS155955-supplement-Supp1.pdf]
